# Supplementary material for: Gas phase RDX decomposition pathways using coupled cluster theory
Source: Royal Society of Chemistry journal article supplement (doi:10.1039/c6cp05121a), 2016-01-01
Supplement: c6cp05121a1.pdf [file c6cp05121a1.pdf]

## **Gas Phase RDX Decomposition Pathways using Coupled Cluster Theory**

Robert W. Molt, Jr., Thomas Watson, Jr., Alexandre P. Bazanté, Rodney J. Bartlett  
and Nigel G. J. Richards

### **Sections of Supporting Information**

- 1.) NN Homolysis Pathway Reactions**
- 2.) Reaction Energies**
- 3.) Coordinates of All Structures**
- 4.) Reference SCF Wavefunctions used in MBPT(2) Geometry Optimizations**
- 5.) RDR Energetics**
- 6.) Some Tests of Static Correlation Being Conquered using CCSDT on Small Model Systems**

## 1.) NN Homolysis Pathway Sub Reactions

A major part of our study investigated the sub-reactions of the NN homolysis pathway. We began studying these reactions before the results of NN homolysis finished; obviously the conclusion of the NN homolysis barrier negates the value of these sub-reaction barriers. Nonetheless, as these are commonly studied reactions in the literature, we list the results here in the Supplementary Information. We are also open-minded that perhaps an explicitly multi-reference wavefunction methodology might overturn our results. As of today, no such method exists which can reliably capture both static and dynamic correlation consistently as well as CCSD(T), but that day may yet come. Many multi-reference coupled cluster methodologies are in development that even go so far as including perturbative triples (references).

We consider two possibilities: a CN bond scission or a second NN homolysis.

*Double NN Homolysis:* If one homolysis was good, two might be just fine. In Figure S1, we show the reaction path for a second homolytic nitramine cleavage. Obviously making a diradical structure is undesirable; a concomitant proton transfer allows the formation of a much more stable closed shell species.

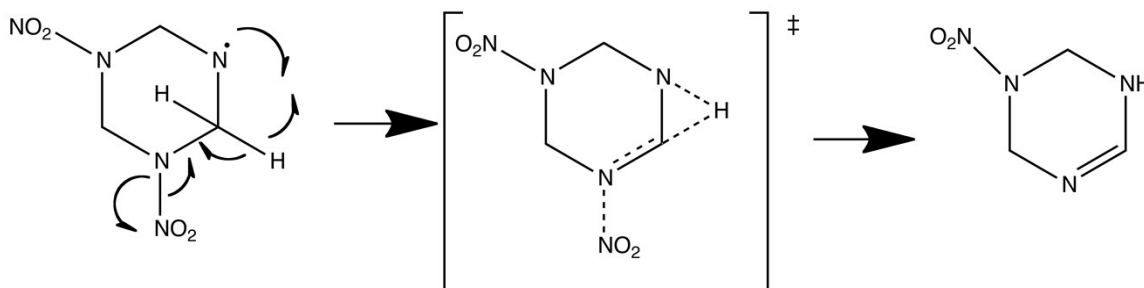

Figure S1: Second NN Homolysis with Concomitant Proton Transfer

Note that the product of the reaction in Figure S1 is similar to the HONO elimination product in making a nitrogenous heterocycloalkene. The barrier to this reaction is rather small; if NN homolysis were the first step at STP conditions, this reaction would be easy to accomplish. Table S1 shows how cheap the reaction is, as well as the usual trend of the MBPT underestimation, CCSD overestimation relative to CCSD(T).

| Many-Body Method            | AE   |
|-----------------------------|------|
| $\Delta E^\ddagger$ MBPT(2) | 42.2 |
| $\Delta E^\ddagger$ CCSD    | 59.8 |
| $\Delta E^\ddagger$ CCSD(T) | 49.1 |
| $\Delta H^\ddagger$ CCSD(T) | 44.8 |
| $\Delta G^\ddagger$ CCSD(T) | 40.5 |

Table S1: Electronic Energies, Enthalpies, and Gibbs Energies of Double NN Homolysis, kcal/mol.

In particular, we isolated a transition state structure that is axial/equatorial in nature, and hence this is the only logical comparison.

*NN Homolysis into CN Bond Scission:* A subsequent CN bond scission results in a compound commonly known in the RDX literature as RDR-o, shown in Figure S2. This isomerization has a very low barrier, as shown in Table S2. The transition state formed is an axial-axial structure, and hence this is the relevant comparison. This provides a clear means of breaking the ringed structure and proceeding to exergonic reactions.

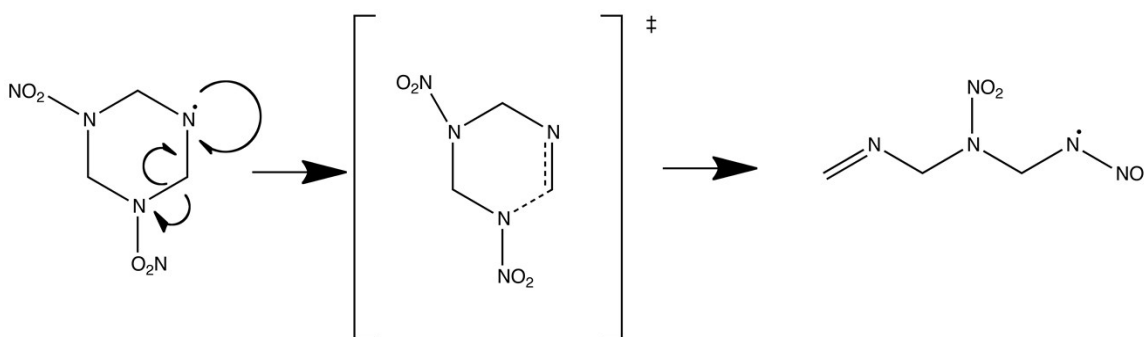

Figure S2: CN Bond Scission Following NN Homolysis

| Many-Body Method            | AA   |
|-----------------------------|------|
| $\Delta E^\ddagger$ MBPT(2) | 38.2 |
| $\Delta E^\ddagger$ CCSD    | 30.6 |
| $\Delta E^\ddagger$ CCSD(T) | 26.5 |
| $\Delta H^\ddagger$ CCSD(T) | 24.0 |
| $\Delta G^\ddagger$ CCSD(T) | 24.4 |

Table S2: Electronic Energies, Enthalpies, and Gibbs Energies of Double NN Homolysis, kcal/mol.

## 2.) Reaction Energies

We list here the energies, enthalpies, and Gibbs energies for the various reactions in this paper. All units are in kcal/mol and are based on CCSD(T)/cc-pVTZ. We do not go through and list the MBPT(2) and CCSD values because none of the reactions have reactants or products which are significantly multi-reference, and thus one is reasonably confident that we need not check for convergence. Consequently, the CCSD(T)/cc-pVTZ value cuts to the chase. The MBPT(2) and CCSD values are available upon request. We list the reaction energies in the order that they occur in the paper.

NN Homolysis:  
cc-pVTZ optimization

AAA Conformer

$\Delta E=48.4$

$\Delta H=44.6$

$\Delta G=31.3$

AAE Conformer

$\Delta E=47.3$

$\Delta H=43.0$

$\Delta G=29.0$

HONO Elimination

AAA Conformer

$\Delta E=-6.6$

$\Delta H=-9.5$

$\Delta G=-22.8$

AAE Conformer

$\Delta E=-5.4$

$\Delta H=-8.6$

$\Delta G=-22.4$

AEE Conformer

$\Delta E=-6.5$

$\Delta H=-9.8$

$\Delta G=-23.5$

EEE Conformer

$\Delta E=-11.2$

$\Delta H=-14.4$

$\Delta G=-27.8$

Triple Whammy

$\Delta E=55.8$

$\Delta H=48.3$

$\Delta G=18.8$

HONO reaction followed by NN Homolysis

$\Delta E=39.9$

$\Delta H=36.0$

$\Delta G=23.4$

HONO reaction followed by HONO Elimination

$\Delta E=-8.1$

$\Delta H=-11.3$

$\Delta G=-24.4$

HONO reaction followed by HONO Elimination followed by HONO Elimination

$\Delta E=-26.8$

$\Delta H=-29.6$

$\Delta G=-41.8$

TAZ Triple Whammy

$\Delta E=43.5$

$\Delta H=35.1$

$\Delta G=12.3$

Double Whammy of Double HONO Elimination Product

$\Delta E=34.6$

$\Delta H=26.7$

$\Delta G=2.3$

Simultaneous NN Homolysis with CN Bond Scission of Double HONO Elimination Product

$\Delta E=87.2$

$\Delta H=84.5$

$\Delta G=70.1$

Simultaneous NN Homolysis with CN Bond Scission of Double HONO Elimination Product

$\Delta E=$

$\Delta H=$

$\Delta G=$

Double NN Homolysis

AA Reaction

$\Delta E=-31.5$

$\Delta H=-33.4$

$\Delta G=-46.0$

AE Reaction

$\Delta E=-29.3$

$\Delta H=-30.9$

$\Delta G=-43.3$

EE Reaction

$\Delta E=-32.6$

$\Delta H=-30.4$

$\Delta G=-45.9$

NN Homolysis into CN Bond Scission

AA

$\Delta E=$

$\Delta H=$

$\Delta G=$

AE

$\Delta E=$

$\Delta H=$

$\Delta G=$

EE  
 $\Delta E =$   
 $\Delta H =$   
 $\Delta G =$

### 3.) Coordinates of All Structures

All coordinates are given in Å; all compounds are listed in the same order as in the paper.

RDX Conformers

AAA

|   |   |             |             |             |
|---|---|-------------|-------------|-------------|
| C | 6 | -1.16295964 | -0.79400080 | 1.22350859  |
| N | 7 | 0.10716238  | -1.40463786 | 0.85183201  |
| N | 7 | -1.27102659 | 0.60968523  | 0.84754198  |
| H | 1 | -1.21279742 | -0.82635579 | 2.31583821  |
| H | 1 | -1.98872437 | -1.35966289 | 0.80130596  |
| C | 6 | 1.26932473  | -0.60782338 | 1.22421070  |
| C | 6 | -0.10823470 | 1.40569255  | 1.21865358  |
| N | 7 | -1.83587676 | 0.87750583  | -0.43857850 |
| N | 7 | 0.15490138  | -2.02494196 | -0.43600374 |
| N | 7 | 1.16257744  | 0.79601652  | 0.84857657  |
| O | 8 | -1.60617149 | 1.98022572  | -0.90767827 |
| O | 8 | -2.56169405 | 0.01098062  | -0.89791944 |
| O | 8 | 1.26708631  | -2.21518383 | -0.90033261 |
| O | 8 | -0.91557321 | -2.38008550 | -0.90155414 |
| H | 1 | 1.32323782  | -0.63257121 | 2.31655519  |
| H | 1 | 2.17173935  | -1.04100344 | 0.80218112  |
| H | 1 | -0.18420429 | 2.40192388  | 0.79214366  |
| H | 1 | -0.11366417 | 1.46950918  | 2.31074875  |
| N | 7 | 1.68170822  | 1.14774190  | -0.43655957 |
| O | 8 | 1.28983846  | 2.20461162  | -0.90371500 |
| O | 8 | 2.52926962  | 0.40047047  | -0.89697593 |

AAE

|   |   |             |             |             |
|---|---|-------------|-------------|-------------|
| C | 6 | -0.42965060 | -1.02081260 | -1.17434941 |
| N | 7 | -0.41099075 | -1.09307159 | 0.28106562  |
| C | 6 | 0.93855612  | -1.02081403 | 0.82632065  |
| N | 7 | 1.54270848  | 0.21406670  | 0.40973655  |
| C | 6 | 1.49313198  | 0.44326638  | -1.02111460 |
| N | 7 | 0.17768825  | 0.21406903  | -1.58627093 |
| N | 7 | -0.69354886 | 1.33561067  | -1.54357151 |
| O | 8 | -0.16342057 | 2.42189123  | -1.66005607 |
| O | 8 | -1.88310206 | 1.09752473  | -1.46972800 |

|   |   |             |             |             |
|---|---|-------------|-------------|-------------|
| N | 7 | 1.18693383  | 1.33561009  | 1.20616476  |
| O | 8 | 1.48777527  | 2.42188700  | 0.75438334  |
| O | 8 | 0.68666802  | 1.09753034  | 2.28793514  |
| N | 7 | -1.18558077 | -2.12715093 | 0.81078644  |
| O | 8 | -0.88436049 | -2.51535139 | 1.92590848  |
| O | 8 | -2.11552623 | -2.51534467 | 0.12563181  |
| H | 1 | 0.16195724  | -1.82767207 | -1.61118877 |
| H | 1 | -1.44446392 | -1.07509703 | -1.52816811 |
| H | 1 | 1.56022112  | -1.82767418 | 0.43343369  |
| H | 1 | 0.90021977  | -1.07509872 | 1.90036170  |
| H | 1 | 1.81213024  | 1.45005197  | -1.23926803 |
| H | 1 | 2.16819487  | -0.26878595 | -1.48277476 |

AEE

|   |   |             |             |             |
|---|---|-------------|-------------|-------------|
| C | 6 | 0.88001330  | 0.71964661  | 1.22396750  |
| N | 7 | -0.47236420 | 0.35176354  | 1.54148454  |
| N | 7 | 1.22622534  | 0.11923046  | -0.05622963 |
| H | 1 | 0.91420889  | 1.80854940  | 1.17836899  |
| H | 1 | 1.55451781  | 0.35982412  | 1.98054444  |
| C | 6 | -1.41783302 | 0.71304004  | 0.52136215  |
| C | 6 | 0.35219667  | 0.47380483  | -1.15631812 |
| N | 7 | 2.58085163  | 0.20728212  | -0.38255790 |
| N | 7 | -0.59379535 | -1.00993912 | 1.95146864  |
| N | 7 | -0.98572127 | 0.11289981  | -0.73257891 |
| O | 8 | 2.86398511  | 0.12124610  | -1.56419752 |
| O | 8 | 3.35426069  | 0.32310896  | 0.55168612  |
| O | 8 | -1.68984462 | -1.51276578 | 1.81718446  |
| O | 8 | 0.39257332  | -1.50672342 | 2.45393318  |
| H | 1 | -1.42643172 | 1.80182054  | 0.46270692  |
| H | 1 | -2.39820044 | 0.34843327  | 0.77191911  |
| H | 1 | 0.61961348  | -0.10213756 | -2.02550387 |
| H | 1 | 0.42096960  | 1.54360707  | -1.39124212 |
| N | 7 | -1.92664827 | 0.19429510  | -1.76081306 |
| O | 8 | -1.50008341 | 0.10863559  | -2.89859383 |
| O | 8 | -3.09087573 | 0.30454892  | -1.41903832 |

EEE

|   |   |             |             |             |
|---|---|-------------|-------------|-------------|
| C | 6 | 1.32329211  | 0.50222228  | 0.24904018  |
| N | 7 | 0.21155379  | 1.31195836  | -0.19842602 |
| N | 7 | 1.03129110  | -0.83911171 | -0.20634193 |
| H | 1 | 1.43411850  | 0.54044327  | 1.33985055  |
| H | 1 | 2.22816680  | 0.84877242  | -0.21863143 |
| C | 6 | -1.09560159 | 0.89133859  | 0.25574898  |
| C | 6 | -0.22311653 | -1.39802321 | 0.24740941  |

|   |   |             |             |             |
|---|---|-------------|-------------|-------------|
| N | 7 | 2.10883188  | -1.71617140 | -0.04589866 |
| N | 7 | 0.43238660  | 2.68263538  | -0.02942305 |
| N | 7 | -1.24146538 | -0.47353902 | -0.19996979 |
| O | 8 | 1.83950367  | -2.90327917 | -0.00493537 |
| O | 8 | 3.21645621  | -1.21138229 | -0.00346659 |
| O | 8 | -0.55871434 | 3.38892662  | 0.01854819  |
| O | 8 | 1.59507628  | 3.04296895  | 0.01266030  |
| H | 1 | -1.18299336 | 0.96151686  | 1.34709985  |
| H | 1 | -1.84864860 | 1.50456242  | -0.20738779 |
| H | 1 | -0.37819012 | -2.35395514 | -0.22137649 |
| H | 1 | -0.23894501 | -1.51542389 | 1.33808696  |
| N | 7 | -2.53880702 | -0.96849306 | -0.03261272 |
| O | 8 | -2.65528777 | -2.18019725 | 0.00808032  |
| O | 8 | -3.43187332 | -0.14171742 | 0.01546727  |

#### Boat

|   |   |             |             |             |
|---|---|-------------|-------------|-------------|
| C | 6 | 0.37468575  | -0.17977823 | -1.14072348 |
| N | 7 | 0.23973259  | 1.04481756  | -0.36872309 |
| N | 7 | 0.34434802  | -1.33868218 | -0.27708769 |
| H | 1 | -0.46537387 | -0.28815167 | -1.81929847 |
| H | 1 | 1.29260745  | -0.12908512 | -1.70761439 |
| C | 6 | -0.45465973 | 0.87503051  | 0.90691117  |
| C | 6 | -0.91830086 | -1.46264174 | 0.43666585  |
| N | 7 | 1.48484771  | -1.45274469 | 0.54210759  |
| N | 7 | 1.36987993  | 1.85111467  | -0.29743090 |
| N | 7 | -1.45751639 | -0.14042232 | 0.71951225  |
| O | 8 | 1.40902327  | -2.22122462 | 1.48328536  |
| O | 8 | 2.46045471  | -0.80912868 | 0.19536700  |
| O | 8 | 1.47780044  | 2.51118523  | 0.72521726  |
| O | 8 | 2.09821071  | 1.87094569  | -1.27061014 |
| H | 1 | -0.90563077 | 1.80478504  | 1.21288854  |
| H | 1 | 0.21613017  | 0.52877206  | 1.69145623  |
| H | 1 | -0.73274221 | -1.99854541 | 1.35708680  |
| H | 1 | -1.63829805 | -1.99694089 | -0.16639291 |
| N | 7 | -2.52817791 | 0.26865578  | -0.10651687 |
| O | 8 | -3.19646273 | -0.61429075 | -0.61386027 |
| O | 8 | -2.71938785 | 1.46687484  | -0.18141598 |

#### Cope

|   |   |             |             |             |
|---|---|-------------|-------------|-------------|
| C | 6 | 0.01617568  | -1.68950754 | 0.66822138  |
| C | 6 | -0.32686644 | 0.18278015  | -0.95680343 |
| C | 6 | 1.78441325  | 1.21219098  | 0.06225913  |
| H | 1 | 0.20803619  | -2.52819484 | -0.00165220 |
| H | 1 | 0.32766867  | -0.35298022 | -1.63775178 |



|   |   |             |             |             |
|---|---|-------------|-------------|-------------|
| H | 1 | 2.31375333  | 2.10664537  | -0.23162215 |
| H | 1 | -0.42473242 | -2.04612987 | 1.58612662  |
| H | 1 | 1.79031623  | 1.12767301  | 1.14236456  |
| N | 7 | 2.46474475  | 0.11424715  | -0.58182509 |
| N | 7 | 2.12820341  | -1.03213530 | -0.17521223 |
| O | 8 | 1.21596640  | -1.05338177 | 1.01393404  |
| N | 7 | -0.85974766 | -0.68998675 | 0.07242240  |
| N | 7 | 0.41211255  | 1.30089739  | -0.44551983 |
| N | 7 | -2.16897044 | -1.12587122 | -0.10771964 |
| O | 8 | -2.89164441 | -0.47589455 | -0.83882786 |
| O | 8 | -2.47874148 | -2.12485362 | 0.52607130  |
| O | 8 | 2.44975225  | -2.10846822 | -0.58168058 |
| N | 7 | -0.34321172 | 2.25569370  | 0.21179340  |
| O | 8 | 0.28697129  | 3.05184923  | 0.89300492  |
| O | 8 | -1.54785853 | 2.23284038  | 0.02968684  |
| H | 1 | -1.17728285 | 0.55920330  | -1.50554441 |

NONO

|   |   |             |             |             |
|---|---|-------------|-------------|-------------|
| H | 1 | 1.48060762  | -1.68007696 | 0.70828861  |
| C | 6 | 0.78212530  | -0.95417860 | 1.08256806  |
| H | 1 | 0.89419435  | -0.84079158 | 2.16067553  |
| C | 6 | 0.10494744  | 1.30498009  | 0.98009135  |
| H | 1 | 0.29829468  | 2.26254538  | 0.53163956  |
| H | 1 | 0.23578530  | 1.36041284  | 2.06071548  |
| N | 7 | 0.98421957  | 0.30866210  | 0.39319738  |
| O | 8 | 2.29833909  | 0.71577880  | 0.67030131  |
| N | 7 | 2.97957155  | 0.85077456  | -0.70608660 |
| O | 8 | 4.07166750  | 1.18415178  | -0.56409035 |
| N | 7 | -0.56405220 | -1.39370375 | 0.84665740  |
| N | 7 | -1.25603448 | 0.91306306  | 0.74710620  |
| C | 6 | -1.56305534 | -0.41673730 | 1.22163182  |
| H | 1 | -1.56632957 | -0.37307208 | 2.30176725  |
| H | 1 | -2.52635759 | -0.72154720 | 0.85381913  |
| N | 7 | -1.74724125 | 1.22663704  | -0.53726519 |
| N | 7 | -0.76594877 | -2.01876665 | -0.40145614 |
| O | 8 | -1.13971741 | 2.07701441  | -1.15862554 |
| O | 8 | -2.77853357 | 0.67413350  | -0.86606101 |
| O | 8 | -1.91978457 | -2.12380717 | -0.76881067 |
| O | 8 | 0.22235425  | -2.46366231 | -0.95194553 |

RDR  
AA

|   |   |            |            |             |
|---|---|------------|------------|-------------|
| C | 6 | 1.19188339 | 1.62317137 | 0.04331203  |
| N | 7 | 0.00016727 | 2.02468601 | -0.64027111 |

|   |   |             |             |             |
|---|---|-------------|-------------|-------------|
| N | 7 | 1.19497177  | 0.29216867  | 0.61174414  |
| H | 1 | 1.31453216  | 2.31708076  | 0.87696907  |
| H | 1 | 2.04225302  | 1.72122414  | -0.60702926 |
| C | 6 | -1.19166661 | 1.62328643  | 0.04317190  |
| C | 6 | -0.00002032 | -0.03665085 | 1.34707068  |
| N | 7 | 1.69112898  | -0.72702052 | -0.22013088 |
| N | 7 | -1.19493315 | 0.29231875  | 0.61167512  |
| O | 8 | 1.47631855  | -1.86742881 | 0.14342459  |
| O | 8 | 2.35220017  | -0.37919080 | -1.18138245 |
| H | 1 | -1.31430825 | 2.31722501  | 0.87679984  |
| H | 1 | -2.04194371 | 1.72140455  | -0.60729311 |
| H | 1 | -0.00008881 | -1.08241252 | 1.59572575  |
| H | 1 | 0.00001528  | 0.56261198  | 2.24704336  |
| N | 7 | -1.69121468 | -0.72683518 | -0.22012474 |
| O | 8 | -1.47661093 | -1.86724041 | 0.14354654  |
| O | 8 | -2.35220075 | -0.37896730 | -1.18142970 |

#### AE

|   |   |             |             |             |
|---|---|-------------|-------------|-------------|
| C | 6 | 0.74741509  | 1.52327876  | -0.40160183 |
| N | 7 | 0.86359346  | 0.09288649  | -0.08536494 |
| C | 6 | 0.06379346  | -0.37111579 | 1.04096294  |
| N | 7 | -1.31006185 | -0.03147087 | 0.76495248  |
| C | 6 | -1.49677100 | 1.39872346  | 0.55615059  |
| N | 7 | -0.57819361 | 2.05352200  | -0.33220989 |
| N | 7 | -1.87832222 | -0.84257073 | -0.25994960 |
| O | 8 | -2.82319079 | -0.36794173 | -0.86875445 |
| O | 8 | -1.41185314 | -1.96218788 | -0.38274865 |
| N | 7 | 2.17648369  | -0.37081232 | -0.09506899 |
| O | 8 | 2.40835331  | -1.39033440 | 0.54194124  |
| O | 8 | 2.97195264  | 0.26817637  | -0.77302593 |
| H | 1 | 1.36196602  | 2.11973350  | 0.29254367  |
| H | 1 | 1.14380532  | 1.68891621  | -1.39820487 |
| H | 1 | 0.33779188  | 0.13321934  | 1.97252767  |
| H | 1 | 0.18311938  | -1.43851783 | 1.15075226  |
| H | 1 | -2.51020360 | 1.57285735  | 0.21567088  |
| H | 1 | -1.38485802 | 1.87334507  | 1.53819643  |

#### EE

|   |   |             |            |             |
|---|---|-------------|------------|-------------|
| C | 6 | 0.90559875  | 0.70544127 | 1.20984165  |
| N | 7 | -0.47352230 | 0.67478164 | 1.54222460  |
| N | 7 | 1.22295656  | 0.13537497 | -0.09466203 |
| H | 1 | 1.22398142  | 1.75643078 | 1.25737531  |
| H | 1 | 1.46296083  | 0.17074798 | 1.96615902  |
| C | 6 | -1.43106605 | 0.69874517 | 0.49535362  |

|   |   |             |            |             |
|---|---|-------------|------------|-------------|
| C | 6 | 0.35783558  | 0.53832381 | -1.17539760 |
| N | 7 | 2.57390438  | 0.19253336 | -0.41219759 |
| N | 7 | -0.96160624 | 0.12908046 | -0.76262305 |
| O | 8 | 2.86832072  | 0.13419803 | -1.59411413 |
| O | 8 | 3.34496051  | 0.25879874 | 0.53171338  |
| H | 1 | -1.72709150 | 1.74797411 | 0.35500210  |
| H | 1 | -2.31327845 | 0.15993255 | 0.81149723  |
| H | 1 | 0.63373220  | 0.01170556 | -2.07274797 |
| H | 1 | 0.40947016  | 1.62006170 | -1.35445711 |
| N | 7 | -1.90423936 | 0.17962202 | -1.78148055 |
| O | 8 | -1.48698601 | 0.12157265 | -2.92583101 |
| O | 8 | -3.07168152 | 0.24030299 | -1.43034954 |

#### Twist

|   |   |             |             |             |
|---|---|-------------|-------------|-------------|
| C | 6 | -0.25445194 | -1.25546162 | 0.13797648  |
| N | 7 | 0.93283628  | -0.42353061 | 0.11946910  |
| N | 7 | -1.43377156 | -0.44474179 | 0.32311866  |
| H | 1 | -0.38045745 | -1.74731227 | -0.82014253 |
| H | 1 | -0.14509350 | -1.99409971 | 0.91702203  |
| C | 6 | 0.73367951  | 0.98299800  | -0.24137230 |
| C | 6 | -1.56629065 | 0.51482933  | -0.76229391 |
| N | 7 | -1.50882550 | 0.12952994  | 1.60630667  |
| N | 7 | 1.80668546  | -0.60678011 | 1.18706263  |
| N | 7 | -0.35271932 | 1.16448599  | -1.15473204 |
| O | 8 | -2.26538887 | 1.07454390  | 1.74043195  |
| O | 8 | -0.84749957 | -0.40922614 | 2.47793797  |
| O | 8 | 2.47066198  | 0.36913420  | 1.50566861  |
| O | 8 | 1.87763488  | -1.72857222 | 1.65665278  |
| H | 1 | 1.64587134  | 1.36469723  | -0.67723728 |
| H | 1 | 0.52460212  | 1.58137765  | 0.65431766  |
| H | 1 | -2.29097890 | 1.26915571  | -0.47070601 |
| H | 1 | -1.96844904 | -0.01087422 | -1.62432606 |

#### Transition state of NN Homolysis

|   |   |             |             |             |
|---|---|-------------|-------------|-------------|
| C | 6 | 0.14711186  | -1.49836794 | 1.14314592  |
| N | 7 | -0.78330083 | -0.55990558 | 0.60538081  |
| C | 6 | -0.63460018 | 0.65752251  | 1.34230488  |
| N | 7 | 0.65430135  | 1.23826036  | 0.97096517  |
| C | 6 | 1.74954142  | 0.32102729  | 1.21466632  |
| N | 7 | 1.48953997  | -1.03617730 | 0.78522269  |
| N | 7 | 1.87826716  | -1.33304574 | -0.53635853 |
| O | 8 | 2.83428693  | -0.71576510 | -0.96906958 |
| O | 8 | 1.28383359  | -2.23826796 | -1.09105376 |
| N | 7 | 0.65313032  | 1.84225481  | -0.30142745 |

|   |   |             |             |             |
|---|---|-------------|-------------|-------------|
| O | 8 | 1.73880197  | 2.00602222  | -0.82638859 |
| O | 8 | -0.42512248 | 2.22342429  | -0.72160537 |
| N | 7 | -3.33391736 | -0.35935325 | -0.13878616 |
| O | 8 | -3.26216686 | 0.76945034  | -0.48761311 |
| O | 8 | -3.77538150 | -1.39926730 | -0.49257400 |
| H | 1 | 0.15286153  | -1.54513489 | 2.23597907  |
| H | 1 | 0.00894458  | -2.48381213 | 0.73117941  |
| H | 1 | -0.57346486 | 0.51920875  | 2.42504957  |
| H | 1 | -1.40882765 | 1.36991920  | 1.10505516  |
| H | 1 | 2.64110834  | 0.68495189  | 0.73532366  |
| H | 1 | 1.88338060  | 0.28773229  | 2.28683092  |

#### Transition State of HONO Elimination

|   |   |             |             |             |
|---|---|-------------|-------------|-------------|
| C | 6 | -0.36234027 | -1.20642769 | 1.04063193  |
| N | 7 | 0.87766756  | -0.83523771 | 1.39522598  |
| C | 6 | 1.18336079  | 0.57292224  | 1.54547701  |
| N | 7 | 0.28379529  | 1.48790063  | 0.84095866  |
| C | 6 | -1.10424268 | 1.14691825  | 1.10294758  |
| N | 7 | -1.38182894 | -0.23529985 | 0.77252509  |
| N | 7 | 1.80240525  | -1.21609875 | -0.26811327 |
| N | 7 | 0.57202370  | 1.59782854  | -0.54535734 |
| N | 7 | -2.20144257 | -0.48437557 | -0.34001975 |
| O | 8 | 0.97641809  | -1.87396213 | -0.94785563 |
| O | 8 | 2.96958660  | -1.10326186 | -0.51762429 |
| O | 8 | 1.75400141  | 1.61299461  | -0.85218767 |
| O | 8 | -0.38496191 | 1.72245825  | -1.29680703 |
| O | 8 | -3.02615308 | 0.36795121  | -0.61939156 |
| O | 8 | -2.05235114 | -1.57866398 | -0.87339976 |
| H | 1 | 0.02586320  | -1.70886763 | -0.16655428 |
| H | 1 | -0.72794527 | -2.13511634 | 1.47220143  |
| H | 1 | 1.09277670  | 0.81573605  | 2.60487513  |
| H | 1 | 2.20286700  | 0.76381554  | 1.22907925  |
| H | 1 | -1.24888337 | 1.29502431  | 2.17148867  |
| H | 1 | -1.78057253 | 1.78000243  | 0.54330523  |

#### Product of HONO Elimination

|   |   |             |             |             |
|---|---|-------------|-------------|-------------|
| C | 6 | 1.13898746  | 1.49227684  | 0.00715182  |
| C | 6 | -1.19577132 | 1.52997615  | 0.16856922  |
| C | 6 | -0.01506676 | -0.62312783 | 0.36496404  |
| H | 1 | 2.10777037  | 1.95617615  | -0.05880426 |
| H | 1 | -1.62053034 | 1.64403218  | 1.16717004  |
| H | 1 | -1.85616971 | 2.02074647  | -0.53233037 |
| H | 1 | -0.08083121 | -0.67992813 | 1.45433998  |
| H | 1 | 0.00899419  | -1.61757452 | -0.04863453 |

|   |   |             |             |             |
|---|---|-------------|-------------|-------------|
| N | 7 | 0.08144463  | 2.18202358  | 0.13207747  |
| N | 7 | 1.15861628  | 0.10522553  | -0.04529824 |
| N | 7 | -1.11311338 | 0.11947590  | -0.20812103 |
| N | 7 | 2.37421381  | -0.56781478 | -0.02444210 |
| O | 8 | 3.36199198  | 0.08101215  | -0.31089184 |
| O | 8 | 2.31767604  | -1.75050195 | 0.26316629  |
| N | 7 | -2.32339724 | -0.55684545 | -0.15481854 |
| O | 8 | -2.27535525 | -1.77128840 | -0.04367875 |
| O | 8 | -3.32558544 | 0.13024270  | -0.26214833 |

### Triple Whammy TS

|   |   |             |             |             |
|---|---|-------------|-------------|-------------|
| C | 6 | 0.66883605  | -1.51130183 | 1.41433790  |
| N | 7 | 1.58193765  | 0.26784290  | 0.97972823  |
| C | 6 | 0.97483724  | 1.33787852  | 1.41224276  |
| N | 7 | -1.02287228 | 1.23951024  | 0.97717615  |
| C | 6 | -1.64616680 | 0.18028890  | 1.41299298  |
| N | 7 | -0.56130708 | -1.50263328 | 0.98133236  |
| N | 7 | 2.02256654  | 0.39988096  | -0.38963564 |
| N | 7 | -1.35631145 | 1.54926550  | -0.39384754 |
| N | 7 | -0.66633594 | -1.95026984 | -0.38800066 |
| O | 8 | 1.86199207  | -0.60189398 | -1.06801109 |
| O | 8 | 2.55406433  | 1.44329646  | -0.71638751 |
| O | 8 | -0.40685292 | 1.90422921  | -1.07410227 |
| O | 8 | -2.52584847 | 1.48944323  | -0.72046536 |
| O | 8 | -1.45557886 | -1.31221840 | -1.06611730 |
| O | 8 | -0.02606459 | -2.93051590 | -0.71545271 |
| H | 1 | 1.42664354  | -2.07310209 | 0.88630241  |
| H | 1 | 0.80479637  | -1.31726084 | 2.46946456  |
| H | 1 | 0.73826923  | 1.35903063  | 2.46724016  |
| H | 1 | 1.08310384  | 2.27481334  | 0.88391833  |
| H | 1 | -1.54588214 | -0.03227993 | 2.46852849  |
| H | 1 | -2.51122750 | -0.19672968 | 0.88556446  |

### Product of Triple Whammy

|   |   |             |             |             |
|---|---|-------------|-------------|-------------|
| C | 6 | -1.71081465 | -0.00828818 | 0.38642361  |
| H | 1 | -2.72376781 | -0.36568194 | 0.26553016  |
| H | 1 | -1.48817130 | 0.78194617  | 1.09616992  |
| N | 7 | -0.82243942 | -0.55295747 | -0.34666916 |
| N | 7 | 0.50104313  | 0.00288573  | -0.06572016 |
| O | 8 | 0.60768071  | 1.21454427  | 0.00460036  |
| O | 8 | 1.37276072  | -0.83768344 | 0.02169711  |

### NONO Isomerization TS

|   |   |             |             |             |
|---|---|-------------|-------------|-------------|
| C | 6 | -0.84828197 | -1.21642926 | 1.28103843  |
| N | 7 | 0.55552357  | -1.33668085 | 1.00969911  |
| C | 6 | 1.31038714  | -0.13716931 | 1.29188394  |
| N | 7 | 0.85587992  | -2.12112419 | -0.54508143 |
| O | 8 | 1.93710580  | -2.44487443 | -0.88629062 |
| O | 8 | 0.44605914  | -0.82199369 | -0.89090467 |
| H | 1 | -1.37489564 | -2.04270271 | 0.83496619  |
| H | 1 | -0.92265458 | -1.28421289 | 2.36507278  |
| H | 1 | 2.29066329  | -0.20597728 | 0.84755966  |
| H | 1 | 1.40925781  | -0.15334428 | 2.37706873  |
| N | 7 | 0.69579976  | 1.09351167  | 0.90980915  |
| N | 7 | -1.46351766 | 0.01436471  | 0.87243961  |
| C | 6 | -0.71130547 | 1.19829836  | 1.20264148  |
| H | 1 | -0.80702866 | 1.33907706  | 2.27160667  |
| H | 1 | -1.12022820 | 2.04383358  | 0.67830765  |
| N | 7 | 1.18405110  | 1.72376309  | -0.24660956 |
| N | 7 | -2.08283055 | -0.00844421 | -0.39337439 |
| O | 8 | 2.32459786  | 1.44984125  | -0.56240252 |
| O | 8 | 0.44729703  | 2.53231358  | -0.77338459 |
| O | 8 | -2.51289217 | -1.08386480 | -0.75836359 |
| O | 8 | -2.19880824 | 1.05978472  | -0.95869006 |

#### NONO Cleavage TS

|   |   |             |             |             |
|---|---|-------------|-------------|-------------|
| C | 6 | -1.25846772 | -0.12186692 | -1.41931196 |
| C | 6 | 0.91751132  | -0.88008244 | -0.66806586 |
| C | 6 | 0.39770312  | 1.42744080  | -0.64028002 |
| H | 1 | 1.39603071  | -1.69569332 | -0.16272298 |
| H | 1 | -0.96641308 | -0.04285959 | -2.45700059 |
| H | 1 | -2.30401088 | -0.35886954 | -1.34088843 |
| H | 1 | 0.53987178  | 2.35000218  | -0.10695563 |
| H | 1 | 0.83539812  | 1.49525309  | -1.63576023 |
| H | 1 | 1.34669955  | -0.74925447 | -1.66194869 |
| N | 7 | -0.47313187 | -1.18208450 | -0.83553925 |
| N | 7 | -0.99731834 | 1.16015536  | -0.80816512 |
| N | 7 | 1.00583720  | 0.34320354  | 0.12521708  |
| N | 7 | -1.06784136 | -1.85489025 | 0.25424971  |
| N | 7 | -1.79997034 | 1.47632990  | 0.31079938  |
| O | 8 | 2.36120030  | 0.79899450  | 0.25966768  |
| N | 7 | 3.31776798  | -0.26486999 | 0.07308288  |
| O | 8 | 4.39426197  | 0.13526232  | 0.29330409  |
| O | 8 | -2.28217867 | -1.89000758 | 0.26095840  |
| O | 8 | -0.31243486 | -2.39833835 | 1.03571425  |
| O | 8 | -2.91289835 | 0.98951826  | 0.32395934  |
| O | 8 | -1.33109746 | 2.26446916  | 1.10759514  |

## 2-Nitramine Propane

|   |   |             |             |             |
|---|---|-------------|-------------|-------------|
| C | 6 | 1.32065371  | -1.26705448 | 0.04582275  |
| H | 1 | 0.92199761  | -2.01237490 | -0.63753946 |
| H | 1 | 2.37653891  | -1.11824775 | -0.16516103 |
| H | 1 | 1.20545156  | -1.64156819 | 1.06646835  |
| N | 7 | 0.65479708  | -0.00001840 | -0.14830508 |
| N | 7 | -0.70599243 | -0.00003941 | -0.02002159 |
| C | 6 | 1.32045522  | 1.26710553  | 0.04589523  |
| H | 1 | 2.37642752  | 1.11838225  | -0.16469326 |
| H | 1 | 0.92195819  | 2.01231210  | -0.63769680 |
| H | 1 | 1.20484409  | 1.64172483  | 1.06645283  |
| O | 8 | -1.25201137 | 1.08283546  | 0.02260358  |
| O | 8 | -1.25216743 | -1.08283754 | 0.02269292  |

## 2-Nitramine Propane HONO Elimination TS

|   |   |             |             |             |
|---|---|-------------|-------------|-------------|
| C | 6 | -1.36782357 | -1.12326593 | 0.08479736  |
| N | 7 | -1.02230851 | 0.11341334  | 0.47861349  |
| C | 6 | -1.44285753 | 1.22078016  | -0.34501768 |
| N | 7 | 0.85727528  | 0.06641497  | -0.00289166 |
| O | 8 | 1.08522335  | -1.13757346 | -0.27774092 |
| O | 8 | 1.69443066  | 0.90727302  | 0.16865527  |
| H | 1 | -0.10218683 | -1.49573574 | -0.22279406 |
| H | 1 | -1.58043686 | -1.82761453 | 0.88757077  |
| H | 1 | -2.41873335 | 1.54095542  | 0.02731703  |
| H | 1 | -0.75348809 | 2.05610333  | -0.23300838 |
| H | 1 | -1.55032443 | 0.96272142  | -1.40594255 |
| H | 1 | -1.95061701 | -1.24107783 | -0.83331992 |

## 2-Nitramine Propane NN Homolysis TS

|   |   |             |             |             |
|---|---|-------------|-------------|-------------|
| C | 6 | -1.43291495 | -1.20203190 | -0.16036369 |
| N | 7 | -0.97831755 | 0.00000825  | 0.47145775  |
| C | 6 | -1.43290872 | 1.20203510  | -0.16039513 |
| N | 7 | 0.92054718  | -0.00000148 | 0.03038669  |
| O | 8 | 1.39769564  | -1.08099936 | -0.04257673 |
| O | 8 | 1.39771110  | 1.08099064  | -0.04254468 |
| H | 1 | -2.44144828 | -1.40725883 | 0.21404012  |
| H | 1 | -0.80330972 | -2.03825315 | 0.14160509  |
| H | 1 | -2.44142654 | 1.40729817  | 0.21402830  |
| H | 1 | -0.80327771 | 2.03825385  | 0.14152855  |
| H | 1 | -1.47506376 | 1.14692347  | -1.25693584 |
| H | 1 | -1.47504198 | -1.14695753 | -1.25690817 |

### HONO Elimination to NN Homolysis Transition State

|   |   |             |             |             |
|---|---|-------------|-------------|-------------|
| C | 6 | -0.01463842 | -0.48644110 | 0.63999762  |
| C | 6 | -0.13549271 | 1.43243977  | -0.64691700 |
| C | 6 | 1.59383822  | 1.25100862  | 0.91036878  |
| H | 1 | -0.12687611 | -1.54927281 | 0.50321163  |
| H | 1 | -0.48819009 | -0.21033625 | 1.58117422  |
| H | 1 | -0.61724587 | 2.01301567  | -1.42072934 |
| H | 1 | 2.64927128  | 1.45610596  | 0.84110738  |
| H | 1 | 1.25889485  | 1.53452235  | 1.90674298  |
| N | 7 | 0.88593750  | 2.04491528  | -0.05360535 |
| N | 7 | 1.39057633  | -0.17984059 | 0.79958181  |
| N | 7 | -0.62121624 | 0.22234414  | -0.45979488 |
| N | 7 | 2.19295866  | -0.78661465 | -0.18190344 |
| N | 7 | -3.17414820 | -0.12358969 | 0.08070506  |
| O | 8 | -3.76486184 | 0.16648886  | -0.89838865 |
| O | 8 | 1.79286676  | -1.84253863 | -0.64041465 |
| O | 8 | 3.25743318  | -0.24835099 | -0.43387090 |
| O | 8 | -3.12732778 | -0.95889923 | 0.91796821  |

### Product of HONO Elimination to NN Homolysis

|   |   |             |             |             |
|---|---|-------------|-------------|-------------|
| C | 6 | -0.53476070 | 1.18510923  | 0.75175835  |
| C | 6 | -1.79972433 | -0.00000013 | -0.80444053 |
| C | 6 | -0.53476131 | -1.18511079 | 0.75175692  |
| H | 1 | -1.07949419 | 1.26813926  | 1.68818063  |
| H | 1 | 0.09845238  | 2.05015339  | 0.65280040  |
| H | 1 | -2.46395000 | 0.00000068  | -1.65071315 |
| H | 1 | -1.07949671 | -1.26814030 | 1.68817812  |
| H | 1 | 0.09845159  | -2.05015519 | 0.65280032  |
| N | 7 | -1.48345443 | -1.17372455 | -0.32063223 |
| N | 7 | -1.48345630 | 1.17372391  | -0.32062853 |
| N | 7 | 0.28528076  | -0.00000103 | 0.83547586  |
| N | 7 | 1.35565028  | 0.00000058  | -0.08126874 |
| O | 8 | 1.79617568  | 1.08714452  | -0.40717633 |
| O | 8 | 1.79618046  | -1.08714216 | -0.40717389 |

### Double HONO Elimination TS

|   |   |             |             |             |
|---|---|-------------|-------------|-------------|
| C | 6 | 0.78873544  | 1.45205160  | -0.39731888 |
| N | 7 | -0.23477693 | 2.17369023  | -0.12125017 |
| C | 6 | -1.27680537 | 1.52433214  | 0.60029769  |
| N | 7 | -1.16761405 | 0.31408626  | 1.17929001  |
| C | 6 | 0.14060444  | -0.29276404 | 1.20012237  |
| N | 7 | 0.92361487  | 0.13270834  | 0.03364416  |
| N | 7 | -1.93558435 | -0.76797833 | -0.24885196 |



|   |   |             |             |             |
|---|---|-------------|-------------|-------------|
| N | 7 | 2.14555911  | -0.50571592 | -0.17919351 |
| O | 8 | -2.52666927 | 0.05631682  | -0.98851197 |
| O | 8 | -2.01221120 | -1.96206291 | -0.35633451 |
| O | 8 | 2.37575657  | -1.46015293 | 0.55234008  |
| O | 8 | 2.84463481  | -0.07699521 | -1.08513369 |
| H | 1 | 1.61266947  | 1.83119912  | -0.98503531 |
| H | 1 | -1.99588716 | 2.19912108  | 1.05460273  |
| H | 1 | -2.09145438 | 1.05350397  | -0.38030339 |
| H | 1 | 0.64178229  | 0.00964082  | 2.12536126  |
| H | 1 | 0.05622819  | -1.37428843 | 1.18474250  |

#### Product of Double HONO Elimination

|   |   |             |             |             |
|---|---|-------------|-------------|-------------|
| C | 6 | -2.51457588 | -0.40668806 | 0.14985405  |
| N | 7 | -1.41899864 | -0.62317971 | 0.76431679  |
| C | 6 | -0.85761804 | 0.45128897  | 1.53889570  |
| C | 6 | -2.66458954 | 1.80347321  | 0.57541311  |
| N | 7 | -3.27306479 | 0.77423960  | 0.11759636  |
| H | 1 | 0.21490994  | 0.47939590  | 1.40110472  |
| H | 1 | -3.10524454 | 2.78553538  | 0.55476583  |
| N | 7 | -1.40455628 | 1.73574869  | 1.11062811  |
| N | 7 | -0.80290990 | 2.89305091  | 1.58714534  |
| O | 8 | -1.28651699 | 3.95455047  | 1.24206066  |
| O | 8 | 0.16860243  | 2.71179532  | 2.30148055  |
| H | 1 | -2.93892296 | -1.21648388 | -0.42029686 |
| H | 1 | -1.05705918 | 0.28604502  | 2.59788516  |

#### Triple HONO Elimination TS

|   |     |               |               |               |
|---|-----|---------------|---------------|---------------|
| C | 6.0 | 0.7168356571  | 1.2859248633  | 0.4609453559  |
| N | 7.0 | 1.7164890303  | 1.1882253039  | -0.3919624274 |
| C | 6.0 | 2.0266700601  | -0.0954734304 | -0.7515026478 |
| N | 7.0 | 1.5721837486  | -1.1991482943 | -0.2090244960 |
| C | 6.0 | 0.5880278180  | -0.9990197724 | 0.7576928336  |
| N | 7.0 | 0.0497751259  | 0.2554268913  | 1.0396458643  |
| N | 7.0 | -1.5712306971 | 0.0430953970  | -0.1471585589 |
| O | 8.0 | -1.6630569917 | -1.1831501936 | -0.3163742662 |
| O | 8.0 | -2.3876164372 | 0.8691640984  | -0.4585206453 |
| H | 1.0 | 0.3939312507  | 2.2815768670  | 0.7427174541  |
| H | 1.0 | 2.7700448864  | -0.1964548897 | -1.5320739981 |
| H | 1.0 | -0.4532983135 | -1.4863942814 | 0.2290477660  |
| H | 1.0 | 0.6432369916  | -1.6732025057 | 1.6120185884  |

#### Product of Triple HONO Elimination TS

|   |   |             |            |             |
|---|---|-------------|------------|-------------|
| C | 6 | -5.09598590 | 0.32831342 | -0.00000487 |
|---|---|-------------|------------|-------------|

|   |   |             |             |             |
|---|---|-------------|-------------|-------------|
| N | 7 | -3.76587142 | 0.34011836  | -0.00000810 |
| C | 6 | -3.23234159 | 1.55851654  | -0.00000937 |
| C | 6 | -5.22961163 | 2.55737463  | -0.00000693 |
| N | 7 | -5.88441915 | 1.39962943  | -0.00000370 |
| H | 1 | -2.15685212 | 1.62280702  | -0.00001127 |
| H | 1 | -5.57790461 | -0.63530824 | -0.00000265 |
| H | 1 | -5.82331146 | 3.45644720  | -0.00000624 |
| N | 7 | -3.90768225 | 2.70438912  | -0.00000995 |

#### Triple Whammy of TAZ TS

|   |     |               |               |               |
|---|-----|---------------|---------------|---------------|
| C | 6.0 | 0.1327926085  | 1.5277091689  | -0.0000409843 |
| N | 7.0 | 1.5625368641  | 0.2792621705  | -0.0010457899 |
| C | 6.0 | 1.2566101254  | -0.8788457260 | -0.0002793789 |
| N | 7.0 | -0.5394337311 | -1.4928214633 | 0.0013254400  |
| C | 6.0 | -1.3894524562 | -0.6488195895 | 0.0002766654  |
| N | 7.0 | -1.0231219997 | 1.2135909580  | -0.0003200483 |
| H | 1.0 | 0.7449071982  | 2.4059066353  | 0.0006149265  |
| H | 1.0 | 1.7111285575  | -1.8480172112 | 0.0000372348  |
| H | 1.0 | -2.4560563962 | -0.5578148644 | -0.0006890795 |

#### Products of Triple Whammy of TAZ

|   |   |             |             |             |
|---|---|-------------|-------------|-------------|
| C | 6 | -1.71081465 | -0.00828818 | 0.38642361  |
| H | 1 | -2.72376781 | -0.36568194 | 0.26553016  |
| H | 1 | -1.48817130 | 0.78194617  | 1.09616992  |
| N | 7 | -0.82243942 | -0.55295747 | -0.34666916 |
| N | 7 | 0.50104313  | 0.00288573  | -0.06572016 |
| O | 8 | 0.60768071  | 1.21454427  | 0.00460036  |
| O | 8 | 1.37276072  | -0.83768344 | 0.02169711  |

#### Double Whammy of Double HONO Elimination Product TS

|   |   |             |             |             |
|---|---|-------------|-------------|-------------|
| C | 6 | -0.68941918 | 1.59638356  | 0.30812463  |
| N | 7 | -1.74783246 | 1.41042844  | -0.18736930 |
| C | 6 | -2.13506136 | -0.47864572 | -0.60133729 |
| N | 7 | -1.43031592 | -1.29854592 | -0.12549604 |
| C | 6 | -0.20058080 | -1.34950844 | 0.81633904  |
| N | 7 | 0.46110754  | -0.12862617 | 0.91158646  |
| N | 7 | 1.34697766  | 0.03076322  | -0.13754535 |
| O | 8 | 1.40852295  | -0.80626122 | -1.04823209 |
| O | 8 | 2.02196038  | 1.06412334  | -0.09499502 |
| H | 1 | 0.16821845  | 2.16064034  | 0.61824474  |
| H | 1 | -2.97896883 | -0.29117089 | -1.23032243 |
| H | 1 | -0.64970692 | -1.60088947 | 1.77248117  |
| H | 1 | 0.38830810  | -2.16561478 | 0.41097750  |

Product of Aforementioned

2HCN molecules and what is called MN in the literature:

|   |   |             |             |             |
|---|---|-------------|-------------|-------------|
| C | 6 | -1.71081465 | -0.00828818 | 0.38642361  |
| H | 1 | -2.72376781 | -0.36568194 | 0.26553016  |
| H | 1 | -1.48817130 | 0.78194617  | 1.09616992  |
| N | 7 | -0.82243942 | -0.55295747 | -0.34666916 |
| N | 7 | 0.50104313  | 0.00288573  | -0.06572016 |
| O | 8 | 0.60768071  | 1.21454427  | 0.00460036  |
| O | 8 | 1.37276072  | -0.83768344 | 0.02169711  |

HONO Elimination into Simultaneous CN Bond Scission AND NN Homolysis TS

|   |   |             |             |             |
|---|---|-------------|-------------|-------------|
| C | 6 | -2.62972527 | -0.17189278 | -0.41797322 |
| C | 6 | -0.97889292 | 1.25845797  | 0.18976208  |
| C | 6 | -0.70760371 | -1.00509290 | 0.50252239  |
| H | 1 | -3.59929289 | -0.31368340 | -0.87429937 |
| H | 1 | 0.07427319  | -1.69991704 | 0.18815261  |
| H | 1 | -0.93825255 | -1.27177919 | 1.54044955  |
| H | 1 | -0.62813823 | 2.28043586  | 0.14773863  |
| N | 7 | -0.15405028 | 0.33518639  | 0.48700157  |
| N | 7 | -2.33511106 | 1.08742690  | -0.06057196 |
| N | 7 | -1.88222342 | -1.24444343 | -0.27997107 |
| N | 7 | 2.29481686  | 0.01965928  | -0.20575273 |
| O | 8 | 2.38824136  | -1.15336086 | -0.03625416 |
| O | 8 | 2.98873414  | 0.98236426  | -0.18077217 |

Product of Aforementioned

|   |   |             |             |             |
|---|---|-------------|-------------|-------------|
| H | 1 | -2.09766206 | 1.82293174  | -0.34966180 |
| C | 6 | -1.49866332 | 1.07738176  | 0.14628000  |
| H | 1 | -0.99531412 | 1.34844649  | 1.06454521  |
| N | 7 | -1.42364122 | -0.07524635 | -0.36651117 |
| C | 6 | -0.61489704 | -1.03828516 | 0.20069804  |
| H | 1 | -1.14412224 | -1.88323429 | 0.61280790  |
| N | 7 | 0.64786411  | -1.07827248 | 0.17978080  |
| C | 6 | 1.35678916  | -0.00973078 | -0.36477666 |
| H | 1 | 1.77640494  | -0.19242775 | -1.35011325 |
| N | 7 | 1.60139627  | 1.04949307  | 0.20359673  |

HONO Elimination into CN Bond Scission TS

|   |   |             |             |            |
|---|---|-------------|-------------|------------|
| C | 6 | 1.34535995  | -1.97124466 | 0.08027635 |
| C | 6 | -0.97276142 | -1.40360083 | 0.12203394 |

|   |   |             |             |             |
|---|---|-------------|-------------|-------------|
| C | 6 | 0.03748825  | 0.79451376  | 0.36177789  |
| H | 1 | -1.85317275 | -1.99419601 | -0.05402296 |
| H | 1 | 2.11011377  | -2.25031789 | 0.78597897  |
| H | 1 | 1.61184031  | -1.76325531 | -0.94232844 |
| H | 1 | 0.38527666  | 0.60613102  | 1.37664169  |
| H | 1 | -0.33133718 | 1.80845677  | 0.30482831  |
| N | 7 | 2.22133182  | 0.63585896  | -0.16336972 |
| N | 7 | 0.99659871  | 0.41204343  | -0.62521767 |
| N | 7 | 0.14121642  | -1.96081227 | 0.47143609  |
| N | 7 | -1.10703241 | -0.09254319 | 0.11995603  |
| N | 7 | -2.43601398 | 0.42967688  | -0.09201068 |
| O | 8 | 3.15949855  | 0.12127899  | -0.79903643 |
| O | 8 | 2.39485927  | 1.30602733  | 0.87841840  |
| O | 8 | -2.52448694 | 1.62888471  | -0.03436240 |
| O | 8 | -3.29768426 | -0.38984823 | -0.30772162 |

Product of Aforementioned

Double NN Homolysis TS

|   |   |             |             |             |
|---|---|-------------|-------------|-------------|
| C | 6 | -0.74037822 | 1.44911609  | -0.51893778 |
| N | 7 | -0.83316044 | 0.11323380  | 0.06344721  |
| C | 6 | -0.23580686 | -0.10512143 | 1.38662982  |
| N | 7 | 1.12150842  | 0.38930946  | 1.47078959  |
| C | 6 | 1.32356168  | 1.52217408  | 0.64357916  |
| N | 7 | 0.51834196  | 2.10286982  | -0.26979744 |
| N | 7 | -2.07355194 | -0.47356903 | -0.10520582 |
| N | 7 | 1.87612228  | -1.27159242 | -0.74983462 |
| O | 8 | -2.77160025 | -0.02461176 | -1.01136457 |
| O | 8 | -2.35485354 | -1.40923067 | 0.63626960  |
| O | 8 | 2.75915775  | -2.04552535 | -0.48430106 |
| O | 8 | 1.80319796  | -0.34679282 | -1.52627524 |
| H | 1 | -0.83603971 | 1.35944867  | -1.59979959 |
| H | 1 | -1.55999546 | 2.09029809  | -0.17629772 |
| H | 1 | -0.86792995 | 0.35238528  | 2.16020971  |
| H | 1 | -0.21641769 | -1.17341727 | 1.57525580  |
| H | 1 | 0.90719277  | 1.92830449  | 1.64467760  |
| H | 1 | 2.35711924  | 1.85900197  | 0.61935236  |

Product of Aforementioned

|   |   |             |             |             |
|---|---|-------------|-------------|-------------|
| C | 6 | -1.01790356 | -0.72713342 | -0.14106582 |
| C | 6 | -0.40718988 | 1.25768904  | 1.08119512  |
| C | 6 | -2.62887882 | 0.23150295  | 1.25153135  |

|   |   |             |             |             |
|---|---|-------------|-------------|-------------|
| H | 1 | -0.69951893 | -1.48502574 | -0.84882103 |
| H | 1 | -0.09892561 | 0.93006413  | 2.07986041  |
| H | 1 | 0.09349057  | 2.18873738  | 0.84852663  |
| H | 1 | -3.66008401 | 0.44918316  | 0.99780063  |
| N | 7 | -0.08585452 | 0.25312322  | 0.10341951  |
| H | 1 | 0.50927269  | 0.52043532  | -0.66172384 |
| N | 7 | -2.16619376 | -0.84463911 | 0.40944732  |
| N | 7 | -1.85385986 | 1.46960762  | 1.05755124  |
| N | 7 | -2.26113979 | 2.51209076  | 1.88129479  |
| O | 8 | -3.42515914 | 2.48977582  | 2.26348148  |
| O | 8 | -1.43415889 | 3.38763854  | 2.11927517  |
| H | 1 | -2.59627355 | -0.07408117 | 2.30298371  |

### NN Homolysis into CN Bond Scission TS

|   |   |             |             |             |
|---|---|-------------|-------------|-------------|
| C | 6 | -0.36160164 | -1.61082690 | -0.98499115 |
| N | 7 | 0.96147185  | -1.00502706 | 0.48029729  |
| C | 6 | 0.08480403  | -0.26784851 | 1.39005220  |
| N | 7 | -1.16601709 | 0.20124239  | 0.80809211  |
| C | 6 | -2.06045473 | -0.87565173 | 0.41378096  |
| N | 7 | -1.37303134 | -1.97299124 | -0.24968177 |
| N | 7 | 1.92662146  | -0.14657518 | -0.13416094 |
| N | 7 | -1.04358296 | 1.27894243  | -0.08180801 |
| O | 8 | 2.10135297  | -0.27344898 | -1.33394825 |
| O | 8 | 2.57622764  | 0.53139597  | 0.64667866  |
| O | 8 | -0.00017401 | 1.91580117  | -0.01770436 |
| O | 8 | -2.00705205 | 1.51795387  | -0.79609003 |
| H | 1 | -0.23287142 | -0.59747548 | -1.36442292 |
| H | 1 | 0.20228018  | -2.38301688 | -1.48907866 |
| H | 1 | -0.21307147 | -0.97370634 | 2.16268092  |
| H | 1 | 0.63574792  | 0.56345485  | 1.82059231  |
| H | 1 | -2.51878295 | -1.26679255 | 1.31856594  |
| H | 1 | -2.83874299 | -0.46265703 | -0.22569282 |

### Product of Aforementioned

|   |   |             |             |             |
|---|---|-------------|-------------|-------------|
| C | 6 | 2.15486903  | 2.15182645  | -0.20565153 |
| H | 1 | 2.45026634  | 2.24501790  | 0.84388555  |
| H | 1 | 2.91519533  | 2.30766141  | -0.96173263 |
| N | 7 | 0.97103160  | 1.86400389  | -0.57494761 |
| C | 6 | 0.01201082  | 1.68103910  | 0.49555248  |
| H | 1 | -0.73715936 | 2.46760044  | 0.42199463  |
| H | 1 | 0.47919523  | 1.70211799  | 1.48779212  |
| N | 7 | -0.64264065 | 0.39199029  | 0.38277894  |
| N | 7 | -1.77556286 | 0.32967531  | -0.43735369 |
| C | 6 | -0.49941793 | -0.61048318 | 1.39954793  |

|   |   |             |             |             |
|---|---|-------------|-------------|-------------|
| H | 1 | -0.53353046 | -0.17428190 | 2.39786003  |
| H | 1 | -1.32148478 | -1.32089037 | 1.28586537  |
| N | 7 | 0.73601709  | -1.37417854 | 1.34479751  |
| N | 7 | 1.08777306  | -1.59989921 | -0.01815230 |
| O | 8 | 2.11697467  | -1.06285360 | -0.37809171 |
| O | 8 | 0.34948944  | -2.34477113 | -0.63563948 |
| O | 8 | -1.99061490 | 1.31997750  | -1.11750610 |
| O | 8 | -2.42512375 | -0.70621238 | -0.41475448 |

#### Sulfamine RDX

|   |    |             |             |             |
|---|----|-------------|-------------|-------------|
| C | 6  | 0.44043500  | 0.08817200  | -1.14175600 |
| C | 6  | -0.07887100 | -1.98324500 | 0.00885900  |
| C | 6  | -0.44869500 | 0.12909500  | 1.14243400  |
| H | 1  | -0.60986000 | -2.60928500 | -0.70871900 |
| H | 1  | 1.19468800  | 0.62754900  | -1.71060000 |
| H | 1  | -0.40522300 | -0.13552600 | -1.80325500 |
| H | 1  | -1.16709000 | 0.72369900  | 1.70284700  |
| H | 1  | 0.37480800  | -0.15149800 | 1.81027200  |
| H | 1  | 0.40774800  | -2.63306300 | 0.73688300  |
| N | 7  | 0.94397800  | -1.16832200 | -0.64480600 |
| N | 7  | -1.04116100 | -1.08952800 | 0.64980800  |
| N | 7  | 0.02744500  | 0.89075300  | -0.00152500 |
| N | 7  | 0.09336300  | 2.23030900  | 0.00054200  |
| N | 7  | 2.23769200  | -1.19606200 | -0.11631800 |
| N | 7  | -2.33112000 | -1.02297300 | 0.11449800  |
| S | 16 | 0.28517300  | 2.99789000  | -1.45673100 |
| S | 16 | 3.11939700  | 0.19431100  | -0.07409200 |
| S | 16 | -3.00756300 | -2.44706300 | -0.37305100 |
| S | 16 | -3.10597300 | 0.42977100  | 0.06375000  |
| S | 16 | -0.02247900 | 3.00739900  | 1.46076700  |
| S | 16 | 2.80746500  | -2.66576100 | 0.37310500  |

#### Sulfamine RDX HONO TS

|   |   |             |             |             |
|---|---|-------------|-------------|-------------|
| C | 6 | 0.56819100  | 0.12792400  | -1.10108200 |
| C | 6 | -0.17778500 | -1.95541300 | -0.09830000 |
| C | 6 | -0.48815700 | 0.13835700  | 1.09836900  |
| H | 1 | -0.73046300 | -2.46422600 | -0.88920100 |
| H | 1 | 1.35139200  | 1.62130600  | -1.68817600 |
| H | 1 | -0.01281700 | 0.13317500  | -2.02243600 |
| H | 1 | -1.19526000 | 0.76580600  | 1.63680300  |
| H | 1 | 0.33445500  | -0.14098500 | 1.76574900  |
| H | 1 | 0.22473800  | -2.71201500 | 0.57752300  |
| N | 7 | 0.91118200  | -1.15469800 | -0.63624300 |

|   |    |             |             |             |
|---|----|-------------|-------------|-------------|
| N | 7  | -1.10698800 | -1.05361500 | 0.60262800  |
| N | 7  | 0.03415100  | 0.89196900  | -0.05322000 |
| N | 7  | 0.18708800  | 2.19929800  | 0.03247900  |
| N | 7  | 2.18139800  | -1.32195100 | -0.03192700 |
| N | 7  | -2.39070200 | -0.93201000 | 0.06430700  |
| S | 16 | 0.89263400  | 2.92610000  | -1.36371300 |
| S | 16 | 3.12095200  | 0.00689700  | 0.20134400  |
| S | 16 | -3.12875400 | -2.33834700 | -0.37522800 |
| S | 16 | -3.09309100 | 0.55562600  | -0.04465700 |
| S | 16 | -0.30386200 | 3.11740100  | 1.31688500  |
| S | 16 | 2.63096900  | -2.85962800 | 0.35159700  |

#### Aminated RDX

|   |   |             |             |             |
|---|---|-------------|-------------|-------------|
| C | 6 | 1.51263600  | 0.24187500  | 0.59068300  |
| N | 7 | 0.56443400  | 1.25819900  | 0.13842800  |
| C | 6 | -0.78870000 | 1.14935200  | 0.61279600  |
| N | 7 | -1.28152600 | -0.20314300 | 0.35003800  |
| C | 6 | -0.43648700 | -1.27003600 | 0.88542000  |
| N | 7 | 0.90623300  | -1.10386100 | 0.39323100  |
| N | 7 | 0.72597400  | 1.72687200  | -1.19152300 |
| N | 7 | -2.65393500 | -0.38304500 | 0.52019600  |
| N | 7 | 1.17530200  | -1.73110700 | -0.85510900 |
| O | 8 | 1.83479800  | 1.62208600  | -1.66643200 |
| O | 8 | -0.24341600 | 2.24410000  | -1.70230600 |
| O | 8 | -3.34296100 | 0.61568000  | 0.45200000  |
| O | 8 | -3.03274400 | -1.52429000 | 0.69685600  |
| O | 8 | 0.38318000  | -2.56870300 | -1.22756100 |
| O | 8 | 2.21338200  | -1.41621200 | -1.39575300 |
| H | 1 | 2.38307400  | 0.28834100  | -0.06479100 |
| H | 1 | -1.41887400 | 1.87420200  | 0.10102700  |
| H | 1 | -0.40267800 | -1.22964100 | 1.98647200  |
| H | 1 | -0.83101200 | -2.23680700 | 0.57909300  |
| H | 1 | -0.79489100 | 1.37041300  | 1.69267400  |
| N | 7 | 1.89935500  | 0.49553700  | 1.93601400  |
| H | 1 | 1.15076000  | 0.37592900  | 2.60982500  |
| H | 1 | 2.67295800  | -0.10279800 | 2.20152300  |

#### Aminated RDX HONO TS

|   |   |             |             |            |
|---|---|-------------|-------------|------------|
| C | 6 | 1.27463900  | 0.26474400  | 0.87493500 |
| N | 7 | 0.34449200  | 1.22304900  | 1.05044600 |
| C | 6 | -1.06186600 | 0.97969600  | 0.96507900 |
| N | 7 | -1.37372100 | -0.19709600 | 0.15597700 |
| C | 6 | -0.61717800 | -1.37795500 | 0.55754900 |
| N | 7 | 0.78249700  | -1.05726000 | 0.45464000 |

|   |   |             |             |             |
|---|---|-------------|-------------|-------------|
| N | 7 | 0.56276700  | 2.16234600  | -0.68561200 |
| N | 7 | -2.73182900 | -0.41693600 | -0.08466600 |
| N | 7 | 1.51528800  | -1.68865300 | -0.55078100 |
| O | 8 | 1.61175500  | 1.69254500  | -1.16229100 |
| O | 8 | -0.06240400 | 3.07230500  | -1.13109900 |
| O | 8 | -3.45565400 | 0.55635500  | -0.00876700 |
| O | 8 | -3.05677900 | -1.55069500 | -0.37756700 |
| O | 8 | 1.04487800  | -2.68575000 | -1.05654500 |
| O | 8 | 2.61059100  | -1.20149100 | -0.78659800 |
| H | 1 | 1.74828700  | 0.81570400  | -0.26000700 |
| H | 1 | -1.56873400 | 1.85270200  | 0.54786900  |
| H | 1 | -0.85189200 | -1.65140000 | 1.59912900  |
| H | 1 | -0.85079900 | -2.21603000 | -0.09848200 |
| H | 1 | -1.42336800 | 0.84322200  | 2.00135500  |
| N | 7 | 2.40343900  | 0.31217000  | 1.72567300  |
| H | 1 | 2.20930800  | -0.01972300 | 2.66383500  |
| H | 1 | 3.18653400  | -0.18886400 | 1.32393100  |

#### Methylated RDX

|   |   |             |             |             |
|---|---|-------------|-------------|-------------|
| C | 6 | -2.56026900 | -0.72515200 | 0.20260600  |
| C | 6 | -2.63366100 | 1.52346100  | 1.23106800  |
| C | 6 | -4.68196900 | 0.22444400  | 1.04801400  |
| H | 1 | -2.19657400 | -1.17906800 | -0.72016200 |
| H | 1 | -2.56509500 | 0.98762100  | 2.18842800  |
| H | 1 | -4.31786600 | -0.18112800 | 2.00154500  |
| N | 7 | -4.09709100 | 1.57731900  | 1.03331700  |
| N | 7 | -4.02401700 | -0.65534900 | 0.07203200  |
| N | 7 | -1.95920600 | 0.61383500  | 0.29210000  |
| N | 7 | -1.41664500 | 1.12701600  | -0.91720800 |
| N | 7 | -4.47791100 | -0.66209000 | -1.27135100 |
| N | 7 | -4.53984600 | 2.37391700  | -0.07475000 |
| O | 8 | -0.81879100 | 2.17470400  | -0.83173100 |
| O | 8 | -1.52694000 | 0.43773200  | -1.90984100 |
| O | 8 | -3.92938900 | -1.44886900 | -2.00966300 |
| O | 8 | -5.40707000 | 0.06921200  | -1.54806300 |
| O | 8 | -5.69589800 | 2.72018200  | -0.03601500 |
| O | 8 | -3.71599500 | 2.65662900  | -0.92164100 |
| C | 6 | -2.03061100 | 2.88934500  | 1.48203800  |
| H | 1 | -0.97231000 | 2.78546200  | 1.72910400  |
| H | 1 | -2.11494500 | 3.56103700  | 0.62959900  |
| H | 1 | -2.55926800 | 3.31870600  | 2.33879200  |
| C | 6 | -6.19101000 | 0.13930500  | 1.12783100  |
| H | 1 | -6.46683300 | -0.91644000 | 1.21280900  |
| H | 1 | -6.51138400 | 0.66243500  | 2.03292900  |
| H | 1 | -6.70296500 | 0.57427400  | 0.27406100  |



|   |   |             |             |            |
|---|---|-------------|-------------|------------|
| C | 6 | -2.14246000 | -1.58800500 | 1.37804400 |
| H | 1 | -2.57867500 | -2.58392400 | 1.26272100 |
| H | 1 | -1.05298900 | -1.67663000 | 1.38896100 |
| H | 1 | -2.45341400 | -1.19327500 | 2.35131600 |

#### Methylated RDX Double Whammy TS

|   |   |             |             |             |
|---|---|-------------|-------------|-------------|
| C | 6 | 1.07006867  | -1.28376519 | -0.83940096 |
| N | 7 | -0.45880553 | -1.39436225 | -0.51529106 |
| C | 6 | -1.37558276 | -0.77434835 | -1.22225984 |
| N | 7 | -1.05934821 | 1.34409975  | -0.78567565 |
| C | 6 | 0.09111735  | 1.80469255  | -1.18155894 |
| N | 7 | 1.53322443  | 0.01760331  | -0.57797726 |
| N | 7 | -0.79614285 | -1.84307186 | 0.85086098  |
| N | 7 | -1.44257940 | 1.72805877  | 0.53348054  |
| N | 7 | 2.43044055  | 0.07550130  | 0.44454717  |
| O | 8 | 0.08461544  | -1.72541463 | 1.65025988  |
| O | 8 | -1.89423097 | -2.32344786 | 0.97828790  |
| O | 8 | -1.61351062 | 0.80295949  | 1.30395718  |
| O | 8 | -1.62943405 | 2.90252133  | 0.74978836  |
| O | 8 | 2.75404090  | 1.20428116  | 0.80958818  |
| O | 8 | 2.92307541  | -0.94980555 | 0.92119649  |
| H | 1 | 1.52451835  | -2.02149559 | -0.16782291 |
| H | 1 | -1.01510919 | -0.53078895 | -2.22213456 |
| H | 1 | 0.35632545  | 1.47951509  | -2.18861336 |
| C | 6 | 1.24584822  | -1.69805191 | -2.28609363 |
| H | 1 | 0.74039941  | -2.64142922 | -2.52085477 |
| H | 1 | 0.91690922  | -0.92011679 | -2.98656178 |
| H | 1 | 2.31958683  | -1.82778085 | -2.44922355 |
| C | 6 | 0.89304746  | 2.90548850  | -0.60317501 |
| H | 1 | 0.42709318  | 3.85246499  | -0.90535955 |
| H | 1 | 0.93486387  | 2.86621947  | 0.48653965  |
| H | 1 | 1.91419689  | 2.84810716  | -0.97926543 |
| C | 6 | -2.84664001 | -0.78251480 | -1.03439106 |
| H | 1 | -3.22101311 | -1.78984690 | -1.25143214 |
| H | 1 | -3.13710778 | -0.53928626 | -0.01144503 |
| H | 1 | -3.28970065 | -0.06923884 | -1.73167481 |

#### Cyano RDX

|   |   |             |             |             |
|---|---|-------------|-------------|-------------|
| C | 6 | -0.94665877 | -0.62352910 | -1.06271504 |
| C | 6 | -0.40170405 | 0.71073171  | 1.01075595  |
| C | 6 | 1.36624244  | -0.03973730 | -0.58383408 |
| H | 1 | -1.64141121 | -1.46559065 | -0.94082588 |
| H | 1 | -0.67630727 | 1.67803350  | 1.45115297  |
| H | 1 | 1.30805046  | 0.55650829  | -1.51192656 |

|   |   |             |             |             |
|---|---|-------------|-------------|-------------|
| N | 7 | 0.96859531  | 0.82688733  | 0.55405994  |
| N | 7 | -1.27930755 | 0.48059355  | -0.13838441 |
| N | 7 | 0.38289121  | -1.08899145 | -0.74031398 |
| N | 7 | 1.44349513  | 2.16809723  | 0.42773176  |
| N | 7 | 0.45214871  | -2.26929655 | 0.10368833  |
| N | 7 | -2.65320071 | 0.69730094  | 0.06651220  |
| O | 8 | 1.46647889  | -2.39168727 | 0.73425906  |
| O | 8 | -0.50001967 | -3.00262662 | 0.03228399  |
| O | 8 | -3.37645623 | 0.21584494  | -0.77717276 |
| O | 8 | -2.95068759 | 1.35587722  | 1.03630187  |
| O | 8 | 2.36161919  | 2.30356259  | -0.34705649 |
| O | 8 | 0.91818220  | 3.00143407  | 1.12575509  |
| C | 6 | 2.75067994  | -0.50419978 | -0.48968556 |
| N | 7 | 3.87341799  | -0.78987106 | -0.49168709 |
| C | 6 | -0.55104812 | -0.33052261 | 2.03848327  |
| N | 7 | -0.72026236 | -1.16516934 | 2.82570319  |
| C | 6 | -0.98109259 | -0.14171811 | -2.44961042 |
| N | 7 | -0.96419019 | 0.25334056  | -3.53935378 |

#### Cyano RDX Triple Whammy TS

|   |   |             |             |             |
|---|---|-------------|-------------|-------------|
| C | 6 | 1.50775091  | 0.58899287  | 1.18437006  |
| N | 7 | -0.17415538 | 1.56329393  | 0.68913644  |
| C | 6 | -1.26236074 | 1.00835640  | 1.18471430  |
| N | 7 | -1.26579234 | -0.93112757 | 0.68938860  |
| C | 6 | -0.24304057 | -1.59759303 | 1.18594092  |
| N | 7 | 1.44245016  | -0.63053985 | 0.68919932  |
| N | 7 | -0.25575156 | 2.06929878  | -0.64971795 |
| N | 7 | -1.66401052 | -1.25499117 | -0.64955961 |
| N | 7 | 1.91954881  | -0.81377155 | -0.65042249 |
| O | 8 | 0.66838870  | 1.73764313  | -1.36140562 |
| O | 8 | -1.17823577 | 2.80243505  | -0.91325851 |
| O | 8 | -1.83832033 | -0.28888353 | -1.36121011 |
| O | 8 | -1.83858885 | -2.42041813 | -0.91228334 |
| O | 8 | 1.16859606  | -1.44797806 | -1.36058143 |
| O | 8 | 3.01564563  | -0.38253210 | -0.91569229 |
| H | 1 | 1.23139262  | 0.65279877  | 2.23504652  |
| H | 1 | -1.17829242 | 0.73794945  | 2.23556502  |
| H | 1 | -0.04946954 | -1.38841655 | 2.23624298  |
| C | 6 | 0.14533343  | -2.94173861 | 0.81737435  |
| N | 7 | 0.50154155  | -4.03211740 | 0.69131615  |
| C | 6 | 2.47600624  | 1.59823227  | 0.81352223  |
| N | 7 | 3.24136077  | 2.45234863  | 0.68536308  |
| C | 6 | -2.62106962 | 1.34356678  | 0.81633675  |
| N | 7 | -3.74362693 | 1.57950149  | 0.69032007  |

#### 4.) Reference SCF Wavefunctions used in MBPT(2) Geometry Optimizations

By default, a UHF wavefunction was used in all cases for MBPT(2) wavefunctions. However, in some cases, difficulty in convergence of either the geometry optimization or the reference SCF itself was observed. In these cases, we switched to an ROHF reference wavefunction. The following compounds used an ROHF rather than UHF wavefunction:

- AE form of RDR
- RDR-o compound, the product in Figure S2
- Transition state of NN homolysis into a second NN homolysis, (TS of the reaction in Figure S1)

#### 5.) RDR Energetics

Table 2: Electronic Energies, Enthalpies, and Gibbs Energies of RDR Isomers (kcal/mol). Here, AA refers to axial-axial, AE refers to axial-equatorial, etc. The enthalpy and Gibbs energies use the MBPT(2)/cc-pVTZ partition functions and CCSD(T)/cc-pVTZ electronic energies. We list energies to 0.1 kcal/mol for the sake of comparison of internal predictions to the method; we emphasize that the accuracy of the method is no better than what is discussed in the Computational Methodology section.

| Many-Body Method   | AA  | AE  | EE  | Twist |
|--------------------|-----|-----|-----|-------|
| $\Delta E$ MBPT(2) | 1.4 | 0   | 3.2 | 0.0   |
| $\Delta E$ CCSD    | 1.7 | 0   | 2.4 | 0.5   |
| $\Delta E$ CCSD(T) | 2.2 | 0   | 3.3 | 0.6   |
| $\Delta H$         | 3.0 | 0.4 | 0   | 1.3   |
| $\Delta G$         | 6.0 | 3.3 | 0   | 2.5   |

We can see that upon consideration of the free energy, the AA form is much less stable, and EE dominates in RDR.

#### 6.) Testing CCSD(T) in Overcoming Transition State Static Correlation

We now take an aside from the chemistry to examine, critically, whether we believe we have overcome the static correlation inherent to the transition states. The only reason not to trust CCSD(T)/CBS results, quantitatively, is if the static correlation (reflecting too many degeneracies in the single-particle SCF energy levels) is too high to be overcome with only up to perturbative triples excitations. We therefore examine the CCSDT/cc-pVDZ for a smaller model system. If the CCSD(T) and CCSDT numbers agree, it is much harder to argue that the perturbative triples calculation are diverging considering the much higher static correlation captured by full triples excitations. We now examine the HONO elimination vs. NN homolysis of 2-nitramine propane, shown in Figure 3. The “arrow-pushing” mechanisms of 2-nitramine propane are analogous to that of the aforementioned RDX HONO elimination and NN homolysis.

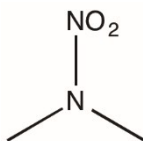

Fig. 3: 2-Nitramine Propane

Obviously, the chemistry of 2-nitramine propane is **not** going to be the same as that of RDX; the latter has a ring structure with several electron withdrawing groups, whereas this one nitramine of 2-nitramine propane has electron donating methyl groups. The relevant feature is the convergence of MBPT(2), CCSD, and CCSD(T) to CCSDT. As the point of this aside is calibration orientated (testing convergence) rather than quantitative, we cheaply calculate the stationary state geometries of the potential energy surface for these reactions with M06<sup>96</sup>/cc-pVTZ. Table 7 gives the values of CCSDT/cc-pVDZ calculations with varying references for the two reaction pathways (dropped core, spherical d functions, and same convergence criteria as before).

Table 7: Electronic Energies of NN Homolysis and HONO Elimination of 2-Nitramine Propane, kcal/mol.

| Many-Body Method            | HONO | NN Homolysis |
|-----------------------------|------|--------------|
| RHF-Instability             |      |              |
| $\Delta E^\ddagger$ MBPT(2) | 53.4 | 26.9         |
| $\Delta E^\ddagger$ CCSD    | 54.6 | 26.7         |
| $\Delta E^\ddagger$ CCSD(T) | 48.9 | 20.3         |
| $\Delta E^\ddagger$ CCSDT   | 49.0 | 20.6         |
| UHF-No Instability          |      |              |
| $\Delta E^\ddagger$ MBPT(2) | 56.3 | 42.2         |
| $\Delta E^\ddagger$ CCSD    | 54.7 | 28.9         |
| $\Delta E^\ddagger$ CCSD(T) | 49.1 | 24.0         |

In Table 7, we demonstrate that the CCSD(T) calculation is well-converged to the CCSDT value; they are trivially different. As in RDX, we do see that the CCSD estimate is a bit off from the CCSD(T) value. Given the presence of an SCF instability, we present both the restricted and un-restricted calculation through CCSD(T) to show the lack of reference dependence as soon as one uses an infinite-order method like CCSD. This is in contrast to MBPT(2), which may diverge as a perturbation and exhibit greater reference dependence as in the NN homolysis barrier being very far away from the CCSD and CCSD(T) values. This gives us greater confidence in our RDX barriers for HONO-style mechanisms and NN homolysis-style mechanisms (“triple whammy” and NONO isomerization being so high in energy that they do not seem worthy of consideration).

There is also an interesting chemical insight to be had. 2-nitramine propane, which may be an acceptable small model for RDX, has chemistry that is very clearly different from RDX. The HONO mechanism is highly unfeasible compared to NN homolysis, whereas the situation is reversed in RDX. The biggest difference seems to be that 2-nitramine propane is not nearly as saturated with electron withdrawing groups, whose effect seems to be to make NN homolysis more favourable. It would seem that the electron deficient nitrogen radical is supported in 2-nitramine propane by the electron donating methyl groups, making the mechanism more favourable than HONO elimination. By contrast, in RDX, the electron deficient nitrogen radical does not have electron-donating groups around it (it has electron-withdrawing groups).
